# Supplementary material
Source: PubMed Central journal article supplement (PMC10323762)
Supplement: jamapsychiatry-e232140-s002.pdf [file jamapsychiatry-e232140-s002.pdf]

## Data Sharing Statement

Danese. Prospective Investigation of the Associations Between Objective and Subjective Experiences of Childhood Maltreatment and the Course of Emotional Disorders in Adulthood. *JAMA Psychiatry*. Published July 05, 2023. doi:10.1001/jamapsychiatry.2023.2140

### Data

**Data available:** No

### Additional Information

**Explanation for why data not available:** The data reported in the current article are not publicly available because they contain extremely sensitive information that could compromise research participant privacy and confidentiality. We cannot provide individual level data from this project because our confidentiality agreement with the participants in this study precludes this. The data are available on request from the corresponding author [CSW] by qualified scientists. Requests require a concept paper describing the purpose of data access, ethical approval at the applicant's university in writing, and provision for secure data access.
